# Supplementary material for: SARS-CoV-2 genomic surveillance in wastewater as a model for monitoring evolution of endemic viruses
Source: PubMed Central journal article supplement (PMC10564906; doi:10.1038/s41467-023-41369-5), 2023-10-10
Supplement: 41467_2023_41369_MOESM1_ESM.pdf [file 41467_2023_41369_MOESM1_ESM.pdf]

## Supplementary figure S1

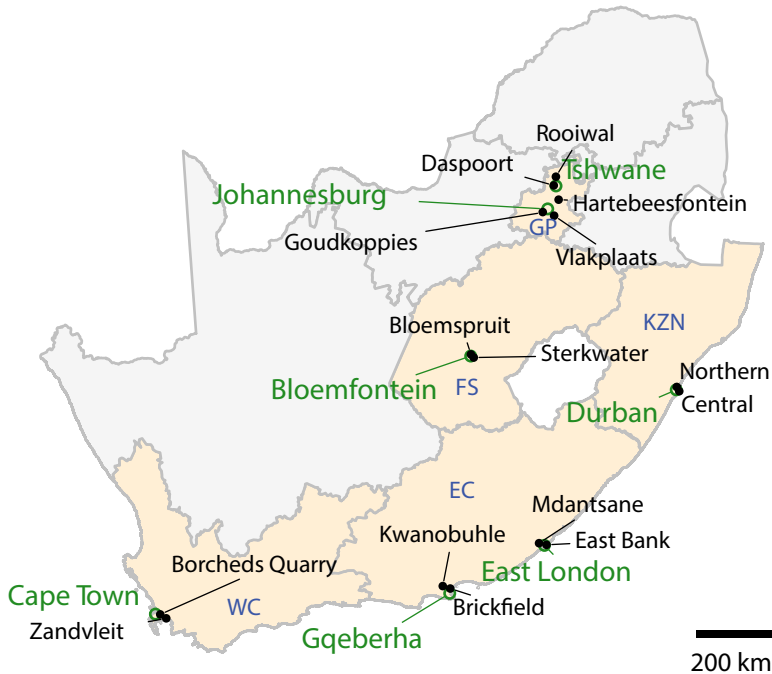

A map showing the distribution of wastewater treatment plants in South Africa

# Supplementary figure S2

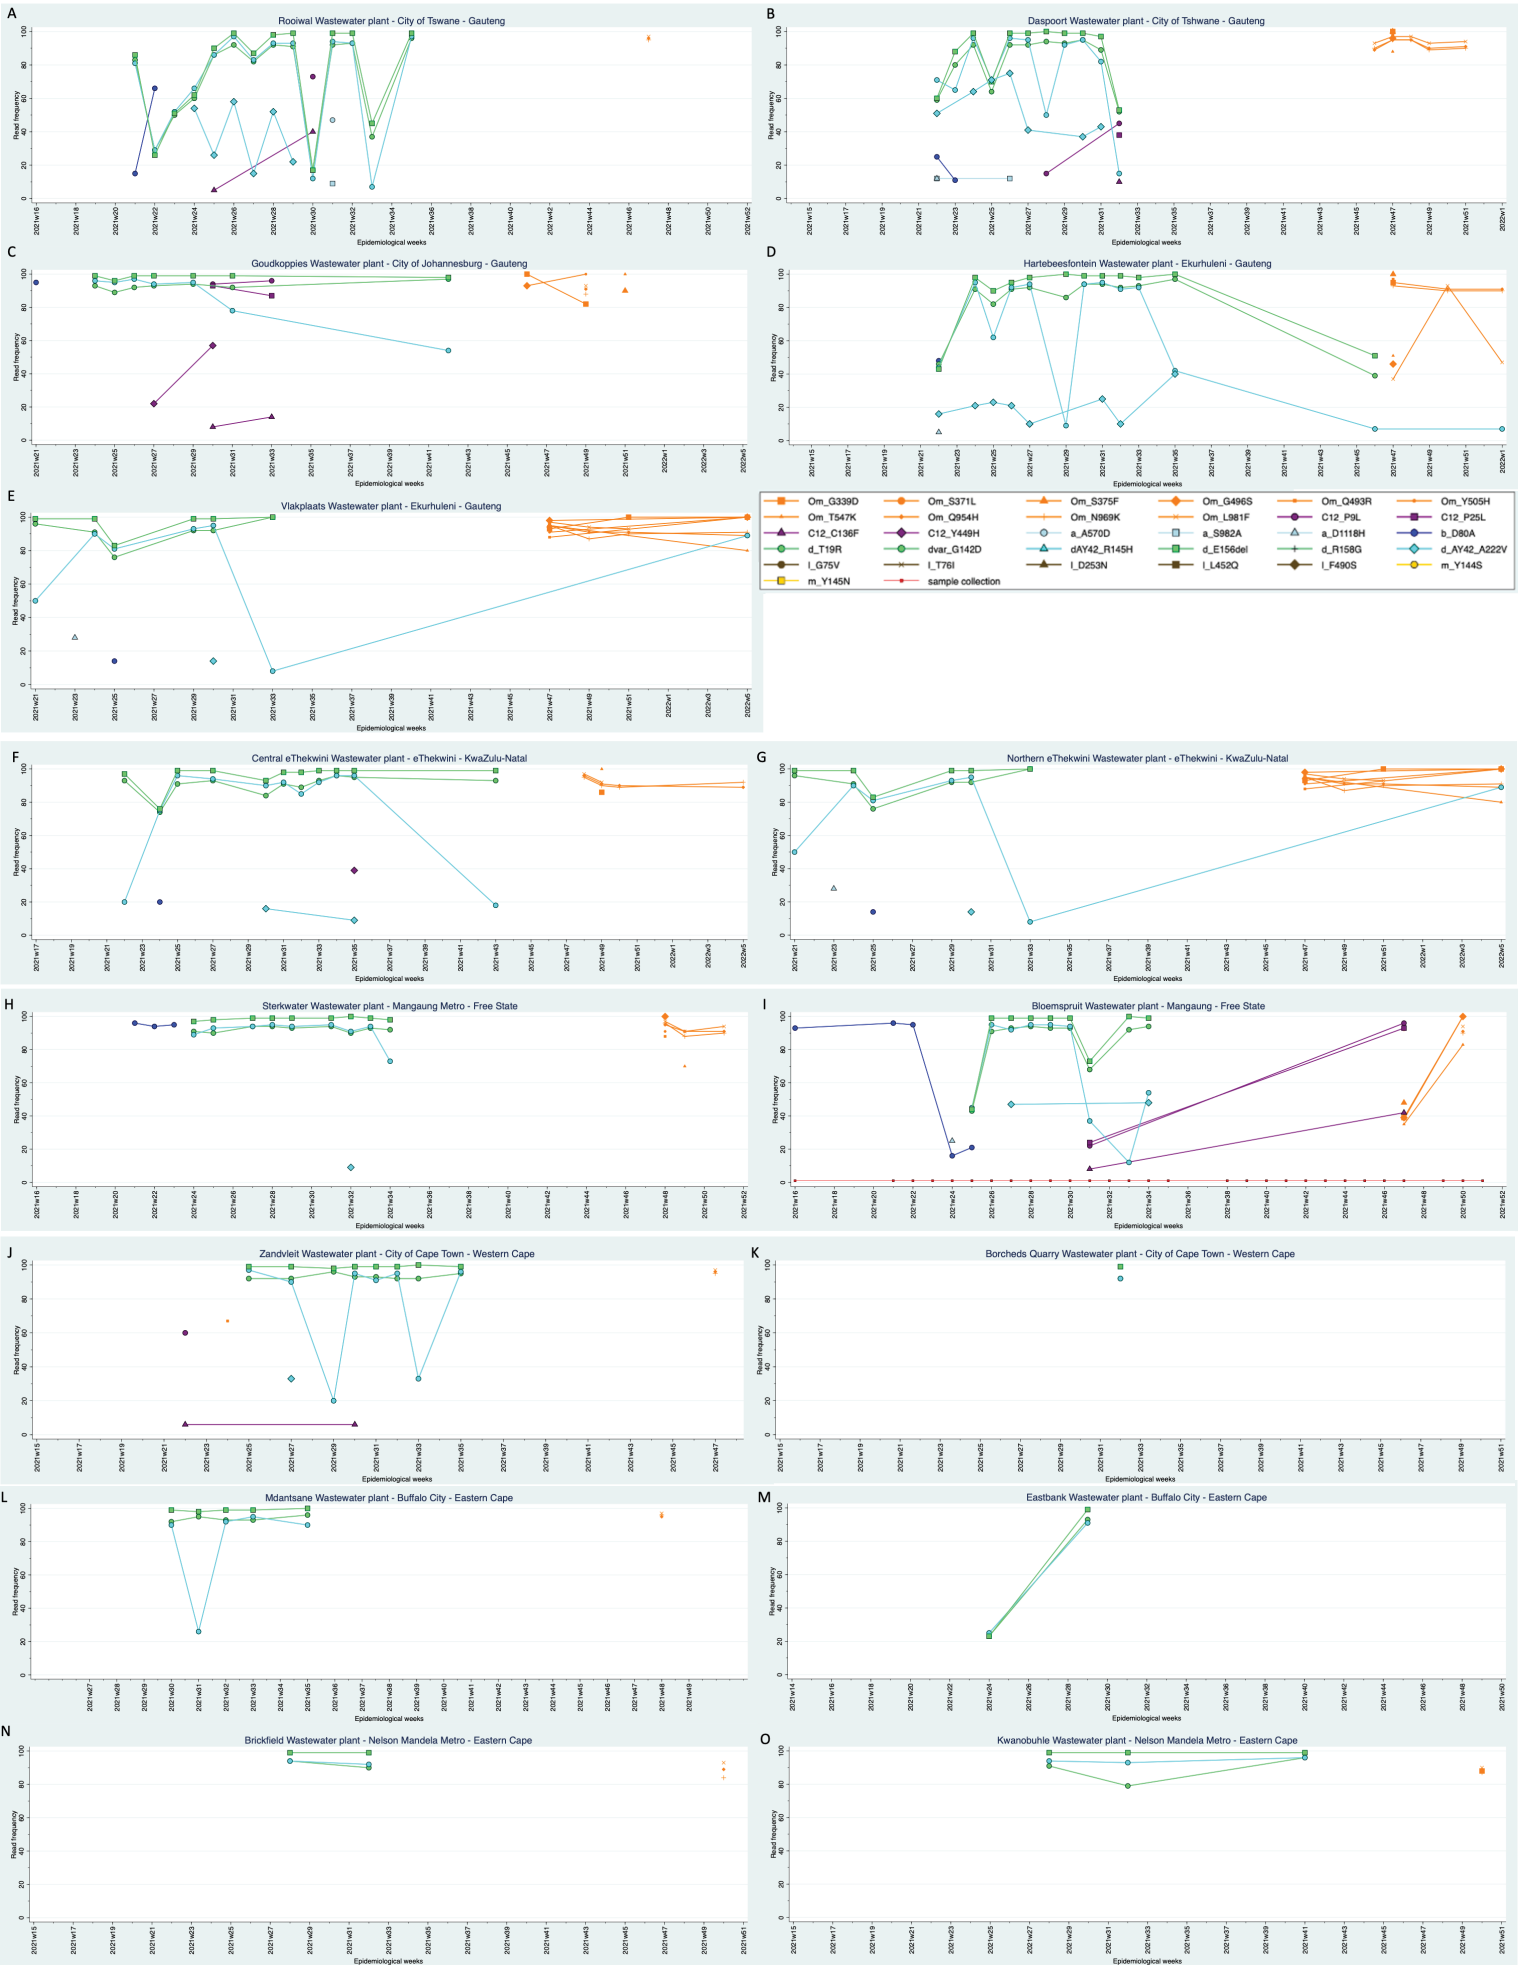

Signature mutation analysis of Variants of concern (VOC) and Variants of interest (VOI)

## Supplementary figures

**Figure S1.** A map showing the distribution of wastewater treatment plants in South Africa for the study. Provinces are denoted in Blue, using the abbreviations GP=Gauteng Province, KZN=KwaZulu-Natal, FS=Free State, EC=Eastern Cape, and WC=Western Cape.

**Figure S2.** Signature mutation analysis of Variants of concern (VOC) and Variants of interest (VOI). The Y axis shows the read frequencies of each mutation, and X axis shows the epidemiological week when the samples were collected. The red line with dots shows the time-point analysed. Different shapes and colours of signature mutations were shown in the key. A-E: Gauteng province sites. F-G: KwaZulu-Natal province. H-I: Free State province. J-K: Western Cape province. L-O: Eastern Cape province.

Table S1. Characteristics of wastewater treatment facilities and samples submitted for SARS-CoV-2 sequencing from the below sites, between April 2021- Jan 2022.

| Province      | Metro or District       | Plant name        | Population size served by the facility | Genomic testing                                      |                                    |
|---------------|-------------------------|-------------------|----------------------------------------|------------------------------------------------------|------------------------------------|
|               |                         |                   |                                        | Epidemiological week when sequencing started in 2021 | # samples submitted for sequencing |
| Eastern Cape  | Buffalo City Metro      | East Bank         | 141000                                 | 15                                                   | 16                                 |
|               |                         | Mdantsane         | 112900                                 | 25                                                   | 19                                 |
|               | Nelson Mandela Metro    | Brickfield        | 40000                                  | 15                                                   | 7                                  |
|               |                         | KwaNobuhle        | 100320                                 | 15                                                   | 7                                  |
| Free State    | Mangaung                | Sterkwater        | 200000                                 | 16                                                   | 28                                 |
|               |                         | Bloemspruit       | 350000                                 | 16                                                   | 30                                 |
| Gauteng       | Ekurhuleni Metro        | Daveyton          | 100000                                 | 20                                                   | 5                                  |
|               |                         | Hartebeesfontain  | 100000                                 | 14                                                   | 27                                 |
|               |                         | Vlakplaats        | 200000                                 | 21                                                   | 19                                 |
|               | Johannesburg Metro      | Northern          | 1200000                                | 14                                                   | 6                                  |
|               |                         | Goudkoppies       | 500000                                 | 21                                                   | 20                                 |
|               | Tshwane Metro           | Rooiwal           | unknown                                | 17                                                   | 29                                 |
| Daspoort      |                         | unknown           | 14                                     | 30                                                   |                                    |
| Kwazulu-Natal | eThekwini Metro         | Northern          | 316425                                 | 17                                                   | 25                                 |
|               |                         | Central           | 350000                                 | 17                                                   | 27                                 |
| Western Cape  | City of Cape Town Metro | Borchard's Quarry | 380000                                 | 15                                                   | 6                                  |
|               |                         | Zandvliet         | 460000                                 | 15                                                   | 24                                 |
| Total         |                         |                   |                                        |                                                      | 325                                |

Table S2. Illustration of amino acid variations in samples, produced by the Galaxy pipeline.

| A       | B                                 | C               | D                     | E      | F        | G                  |
|---------|-----------------------------------|-----------------|-----------------------|--------|----------|--------------------|
| Sample  | QC filter                         | Number of reads | Mutation effect       | GENE   | Mutation | Mutation frequency |
| 21-0128 | PASS                              | 4073            | NON_SYNONYMOUS_CODING | ORF1ab | E41K     | 92                 |
| 21-0128 | PASS                              | 12106           | NON_SYNONYMOUS_CODING | S      | L1203F   | 96                 |
| 21-0128 | min_af_0.1Xmin_dp_5Xmin_dp_alt_10 | 12234           | FRAME_SHIFT           | S      | V1228    | 1                  |
| 21-0128 | PASS                              | 13569           | NON_SYNONYMOUS_CODING | ORF3a  | T190I    | 88                 |
| 21-0128 | PASS                              | 1536            | NON_SYNONYMOUS_CODING | E      | P71L     | 97                 |
| 21-0128 | min_af_0.1Xmin_dp_5Xmin_dp_alt_10 | 1339            | NON_SYNONYMOUS_CODING | M      | I8S      | 1                  |

**A** shows sample ID. **B** is the quality indicator. Filter value 'PASS' are samples with a minimum of 10 reads and read frequency greater than 10. **C** is the number of reads produced for each sample. **D** is the effect of the mutation detected in the gene. **E** is the name of the gene where mutation occurred. **F** is the mutation detected. **G** is the proportion of the mutant cells in a sample or population.

Table S3: List of signature mutations which was used to identify VOC and VOI present in wastewater samples

| <b>Omicron</b> | <b>Alpha</b> | <b>Beta</b> | <b>Delta</b> | <b>C.1.2</b> | <b>Gamma</b> | <b>Lambda</b> | <b>Mu</b> |
|----------------|--------------|-------------|--------------|--------------|--------------|---------------|-----------|
| G339D          | A570D        | D80A        | T19R         | P9L          | T20N         | G75V          | Y144S     |
| S371L          | S982A        |             | R145H        | P25L         | P26S         | T76I          | Y145N     |
| S375F          | D1118H       |             | E156del      | C136F        | T1027I       | D253N         |           |
| Q493R          |              |             | R158G        | Y449H        |              | L452Q         |           |
| G496S          |              |             | A222V        |              |              | F490S         |           |
| Y505H          |              |             |              |              |              |               |           |
| T547K          |              |             |              |              |              |               |           |
| N856K          |              |             |              |              |              |               |           |
| Q954H          |              |             |              |              |              |               |           |
| N969K          |              |             |              |              |              |               |           |
| L981F          |              |             |              |              |              |               |           |

Table S4: Amino acid mutations detected in wastewater samples that were commonly detected in clinical cases

| <b>Mutation</b> | <b>Date first detected</b> | <b>Date last detected</b> | <b>Number of samples detected in Wastewater</b> | <b>Prevalence in wastewater in South Africa</b> |
|-----------------|----------------------------|---------------------------|-------------------------------------------------|-------------------------------------------------|
| P9L             | May, 2021                  | November, 2021            | 8                                               | 2,46                                            |
| T19R            | May, 2021                  | November, 2021            | 120                                             | 36,92                                           |
| T19I            | January, 2022              | January, 2022             | 6                                               | 1,85                                            |
| L24-            | January, 2022              | January, 2022             | 6                                               | 1,85                                            |
| P25-            | January, 2022              | January, 2022             | 6                                               | 1,85                                            |
| P26-            | January, 2022              | January, 2022             | 6                                               | 1,85                                            |
| A27S            | January, 2022              | January, 2022             | 6                                               | 1,85                                            |
| P25L            | July, 2021                 | November, 2021            | 5                                               | 1,54                                            |
| A67V            | April, 2021                | January, 2022             | 20                                              | 6,15                                            |
| T95I            | May, 2021                  | January, 2022             | 34                                              | 10,46                                           |
| C136F           | May, 2021                  | November, 2021            | 9                                               | 2,77                                            |
| G142D           | May, 2021                  | January, 2022             | 125                                             | 38,46                                           |
| Y144-           | 21-May                     | 21-Nov                    | 20                                              | 6,15                                            |
| E156-           | May, 2021                  | November, 2021            | 120                                             | 36,92                                           |
| F157-           | May, 2021                  | November, 2021            | 120                                             | 36,92                                           |
| R158G           | May, 2021                  | November, 2021            | 120                                             | 36,92                                           |
| R190S           | July, 2021                 | November, 2021            | 9                                               | 2,77                                            |
| N211-           | August, 2021               | January, 2022             | 20                                              | 6,15                                            |
| L212I           | August, 2021               | January, 2022             | 20                                              | 6,15                                            |
| V213G           | January, 2022              | January, 2022             | 4                                               | 1,23                                            |
| D215G           | April, 2021                | November, 2021            | 23                                              | 7,08                                            |
| A222V           | June, 2021                 | August, 2021              | 33                                              | 10,15                                           |
| L242-           | June, 2021                 | January, 2022             | 22                                              | 6,77                                            |
| A243-           | June, 2021                 | January, 2022             | 35                                              | 10,77                                           |
| G339D           | November, 2021             | January, 2022             | 13                                              | 4,00                                            |
| S371F           | November, 2021             | January, 2022             | 8                                               | 2,46                                            |
| S373P           | November, 2021             | January, 2022             | 7                                               | 2,15                                            |
| S375F           | November, 2021             | January, 2022             | 7                                               | 2,15                                            |
| K417N           | May, 2021                  | January, 2022             | 20                                              | 6,15                                            |
| K417T           | May, 2021                  | November, 2021            | 13                                              | 4,00                                            |
| N440K           | June, 2021                 | January, 2022             | 8                                               | 2,46                                            |
| G446S           | November, 2021             | January, 2022             | 7                                               | 2,15                                            |
| L452R           | May, 2021                  | November, 2021            | 75                                              | 23,08                                           |
| S477N           | November, 2021             | January, 2022             | 10                                              | 3,08                                            |
| T478K           | May, 2021                  | January, 2022             | 86                                              | 26,46                                           |
| E484K           | May, 2021                  | July, 2021                | 16                                              | 4,92                                            |
| E484A           | June, 2021                 | January, 2022             | 18                                              | 5,54                                            |
| Q493R           | June, 2021                 | January, 2022             | 11                                              | 3,38                                            |

|        |                 |                |     |       |
|--------|-----------------|----------------|-----|-------|
| G496S  | November, 2021  | January, 2022  | 9   | 2,77  |
| Q498R  | July, 2021      | January, 2022  | 12  | 3,69  |
| N501Y  | May, 2021       | January, 2022  | 23  | 7,08  |
| Y505H  | September, 2021 | January, 2022  | 10  | 3,08  |
| T547K  | November, 2021  | January, 2022  | 9   | 2,77  |
| D614G  | April, 2021     | January, 2022  | 108 | 33,23 |
| H655Y  | May, 2021       | January, 2022  | 46  | 14,15 |
| N679K  | June, 2021      | January, 2022  | 50  | 15,38 |
| P681H  | May, 2021       | January, 2022  | 42  | 12,92 |
| P681R  | May, 2021       | December, 2021 | 122 | 37,54 |
| A701V  | April, 2021     | December, 2021 | 35  | 10,77 |
| T716I  | June, 2021      | October, 2021  | 20  | 6,15  |
| N764K  | April, 2021     | January, 2022  | 35  | 10,77 |
| D796Y  | November, 2021  | January, 2022  | 34  | 10,46 |
| D950N  | May, 2021       | December, 2021 | 122 | 37,54 |
| Q954H  | November, 2021  | January, 2022  | 34  | 10,46 |
| N969K  | November, 2021  | January, 2022  | 34  | 10,46 |
| L981F  | November, 2021  | January, 2022  | 28  | 8,62  |
| S982A  | June, 2021      | August, 2021   | 5   | 1,54  |
| D1118H | June, 2021      | June, 2021     | 5   | 1,54  |
